# Supplementary material for: Stabilization of enhanced chirality from pyrene-containing l-glutamide lipid in methyl methacrylate by photo-induced polymerizationElectronic supplementary information (ESI) available: photograph and fluorescence spectra of Pyr-lipid in PMMA solid sheet. See http://www.rsc.org/suppdata/cc/b3/b316673b/
Source: Royal Society of Chemistry journal article supplement (doi:10.1039/b316673b), 2004-01-01
Supplement: esi-1_takafuji.pdf [file esi-1_takafuji.pdf]

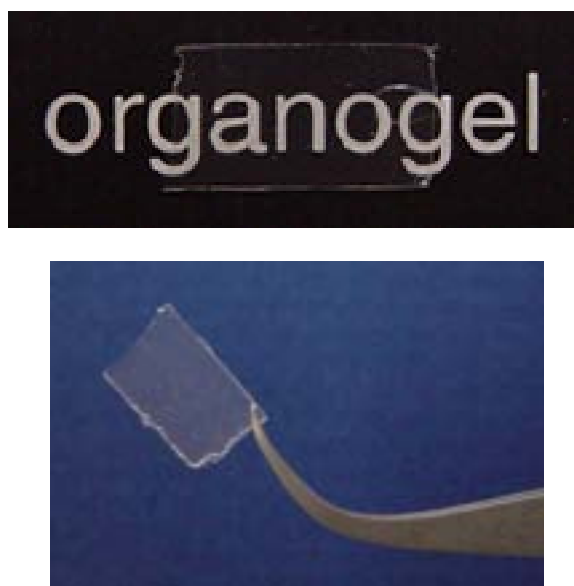

Fig. S-1 Photographs of Pyr-lipid in the poly(methyl methacrylate) solid sheet. This sheet showed enhanced chirality based on highly-ordered structures of lipid.
